# Supplementary material for: When circulatory death does not come in time in potential organ donors
Source: Springer Nature journal article supplement (doi:10.1186/s13054-019-2443-4), 2019-05-02
Supplement: MOESM1 [file 16692110]

## **When circulatory death doesn't come in time in potential organ donors**

**Angela Kotsopoulos<sup>1\*</sup>, Nichon Jansen<sup>2</sup> and Wilson Farid Abdo<sup>3</sup>**

<sup>1</sup> *Department of Intensive Care, Elisabeth-TweeSteden Hospital, Tilburg, the Netherlands, [a.kotsopoulos@etz.nl](mailto:a.kotsopoulos@etz.nl)*

<sup>2</sup> *The Dutch Transplant Foundation, Leiden, the Netherlands, [n.jansen@transplantatiestichting.nl](mailto:n.jansen@transplantatiestichting.nl)*

<sup>3</sup> *Department of Intensive Care Medicine, Radboud University Medical Center, Nijmegen, the Netherlands, [f.abdo@radboudumc.nl](mailto:f.abdo@radboudumc.nl)*

\* Correspondence: [a.kotsopoulos@etz.nl](mailto:a.kotsopoulos@etz.nl)

<sup>1</sup>Department of Intensive Care, Elisabeth-TweeSteden Hospital, Hilvarenbeekseweg 60, 5022 GC, Tilburg, the Netherlands,

**Supplemental Table 1** Baseline characteristics of cDCD donors with a delayed time to death after withdrawal of life-sustaining therapy

| Variable                                  | Present cohort <sup>a</sup> | Suntharalingam et al. <sup>a</sup> | Wind et al. <sup>a</sup> | Xu et al. <sup>a</sup>  | Brieva et al. <sup>a</sup> | Davila et al. <sup>a</sup> |
|-------------------------------------------|-----------------------------|------------------------------------|--------------------------|-------------------------|----------------------------|----------------------------|
| Total number of patients included         | 804                         | 191                                | 211                      | 219                     | 159                        | 417                        |
| Patients with a delayed circulatory death |                             | 83 (43%) <sup>1</sup>              |                          | 53 (24.2%) <sup>1</sup> | 78 (49%) <sup>1</sup>      | 117 (28%) <sup>1</sup>     |
|                                           | 143 (18%) <sup>2</sup>      | 69 (36%) <sup>2</sup>              | 36 (17%) <sup>2</sup>    | 20 (9%) <sup>2</sup>    |                            |                            |
| Time to death median (range)              | 9.5 h (2h-5 days)           | 8 h (2h-3.3 days)                  | 2h-3.8 days              | 2h-1.8 days             |                            |                            |
| Age (years)                               |                             |                                    |                          |                         |                            |                            |
| Median (Min-Max)                          | 57 (26-74)                  | 50 (16-62)                         | 57 (29-75)               |                         | 55 (17-65)                 |                            |
| Mean(SD)                                  | 55.6 (11.4)                 | 48 (10.8)                          | 55.4 (9.9)               |                         |                            | 51 (13)                    |
| Male No.(%)                               | 84 (59%)                    | 45 (65%)                           | 27 (75%)                 |                         | 56 (52%)                   | 76 (64.7%)                 |
| GCS                                       |                             |                                    |                          |                         |                            |                            |
| Median (Min-Max)                          | 4 (3-9)                     |                                    | 3 (3-6)                  |                         | 5 (3-15)                   |                            |
| Mean (SD)                                 | 5.2 (2.7)                   |                                    | 3.6 (0.6)                |                         |                            |                            |
| Motor response absent or extensor         | 60 (49%)                    |                                    | 25(69%) <sup>3</sup>     |                         |                            |                            |
| Corneal reflex present                    |                             |                                    |                          | 4 (20%) <sup>4</sup>    |                            |                            |
| Cough reflex present                      |                             |                                    |                          | 9 (45%) <sup>4</sup>    |                            | 57 (90.8%) <sup>5</sup>    |

| Cause of death                 |                        |                        |                      |                        |                        |
|--------------------------------|------------------------|------------------------|----------------------|------------------------|------------------------|
| Medical <sup>6</sup>           |                        |                        |                      |                        | 60 (50.8%)             |
| Surgical <sup>6</sup>          |                        |                        |                      |                        | 19 (46.3%)             |
| PAE                            | 49 (34%)               | 14 (20%)               | 17 (47%)             |                        | 12 (10.3 %)            |
| Cerebral <sup>7</sup>          | 78 (54%)               | 42 (61%)               | 18 (50%)             | 20 (100%) <sup>8</sup> | 83 (70.9%)             |
| Cerebral bleeding <sup>9</sup> | 44 (29%)               | 27 (39%)               | 12 (33%)             |                        |                        |
| TBI                            | 24 (17 %)              | 15 (22%)               | 3 (8%)               |                        |                        |
| ICH                            | 33 (23%)               |                        | 8 (22%)              |                        |                        |
| SAH                            | 11 (6%)                |                        | 4 (11%)              |                        |                        |
| CVA                            | 10 (7%)                |                        | 3 (8%)               |                        |                        |
| Cardiac                        |                        |                        |                      |                        | 15 (12.8%)             |
| Other                          | 16 (12%) <sup>10</sup> | 13 (19%) <sup>11</sup> | 1 (3%) <sup>12</sup> |                        | 7 (6.3%) <sup>13</sup> |

*cDCD* controlled donation after cardiac death, *CVA* cerebrovascular accident, *GCS* Glasgow Coma Scale, *ICH* intracranial hemorrhage, *Max* maximum, *Min* minimum, *PAE* post anoxic encephalopathy, *SAH* subarachnoid hemorrhage, *SD* standard deviation, *TBI* traumatic brain injury.

<sup>a</sup> Includes cDCD donors

<sup>b</sup> includes neurocritical patients

<sup>1</sup> Includes patients with a circulatory death after 60 minutes

<sup>2</sup> Includes patients with a circulatory death after 120 minutes

<sup>3</sup> Refers to patients with absent motor response

<sup>4</sup> Estimated from the DCD-N score (absent cough reflex equals two points and absent corneal reflex/motor response absent or extensor/oxygenation index >3 each one point) published by the authors

<sup>5</sup> The presence of a gag or cough reflex was added later and includes therefore a part of the population (2008-2009). Within accepted offers, 63 patients do not arrest within 60 minutes in a total of 178 patients

<sup>6</sup> The diagnosis on admission is not further specified

<sup>7</sup> Includes patients with a neurological condition or disorder

<sup>8</sup> Included only patients with traumatic brain injury and spontaneous cerebral hemorrhage

<sup>9</sup> Includes: intracranial hemorrhage (ICH) and subarachnoid hemorrhage (SAH)

<sup>10</sup> Includes: drug intoxication and pulmonary disorders

<sup>11</sup> Includes: cerebral infarction, cerebral edema, intracranial tumor or abscess, hydrocephalus, neurosurgical complication and liver failure

<sup>12</sup> Includes a patient after resection of pituitary adenoma

<sup>13</sup> Includes polytrauma, sepsis and other
